# Supplementary material
Source: HighWire-hosted journal article supplement (https://bmjopen.bmj.com/content/11/10/e049347)
Supplement: inline-supplementary-material-1 [file inline-supplementary-material-1.pdf]

## Supplemental material

### Table of contents

|                                                                                                                                                           |    |
|-----------------------------------------------------------------------------------------------------------------------------------------------------------|----|
| Figure S1. Incidence rate ratio (IRR) of stroke and transient ischaemic attack by country classification.....                                             | 2  |
| Figure S2. Incidence rate ratio (IRR) of ischaemic stroke and intracerebral haemorrhage by country classification.....                                    | 3  |
| Table S1. Data sources and description of variables.....                                                                                                  | 4  |
| Table S2. Age-standardised incidence rates of stroke, stroke types and transient ischaemic attack per 100 000 person years by ethnic group.....           | 5  |
| Table S3. Age-standardised incidence rates of stroke, stroke types and transient ischaemic attack per 100 000 person years by country classification..... | 7  |
| Table S4. Association between duration of residence, age at immigration and all-cause 1-year mortality.....                                               | 8  |
| Table S5. 3-year and 5-year hazard ratios for all-cause mortality by ethnic group.....                                                                    | 9  |
| Table S6. Sensitivity analysis showing all-cause 1-year mortality by ethnic group.....                                                                    | 10 |
| Table S7. Sensitivity analysis showing association between duration of residence, age at immigration and all-cause 1-year mortality.....                  | 11 |
| Table S8. Impact of comorbidities on all-cause 1-year mortality by ethnic group.....                                                                      | 12 |

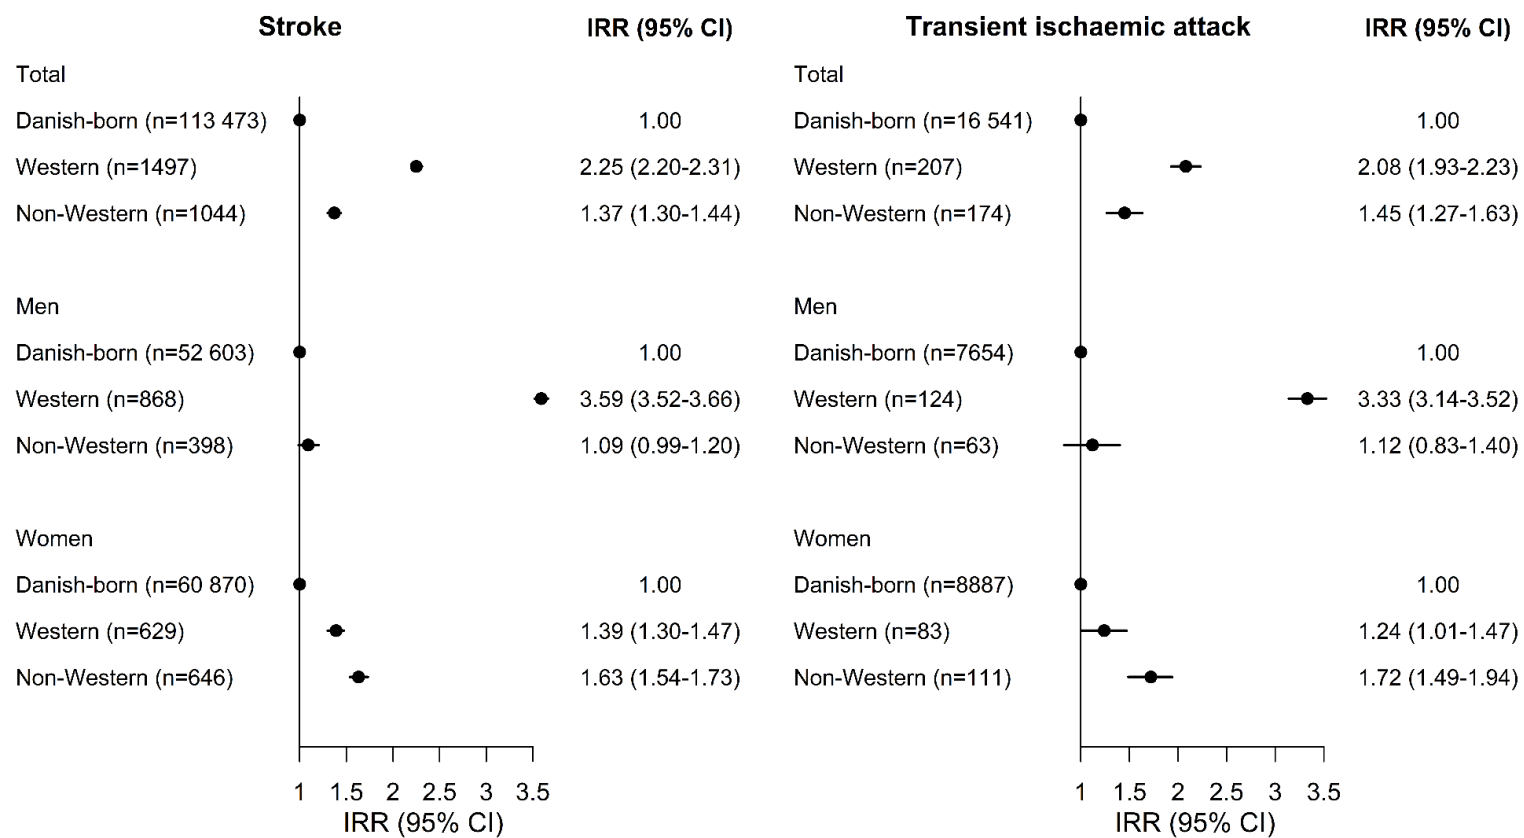

Figure S1. Incidence rate ratio (IRR) of stroke and transient ischaemic attack by country classification.

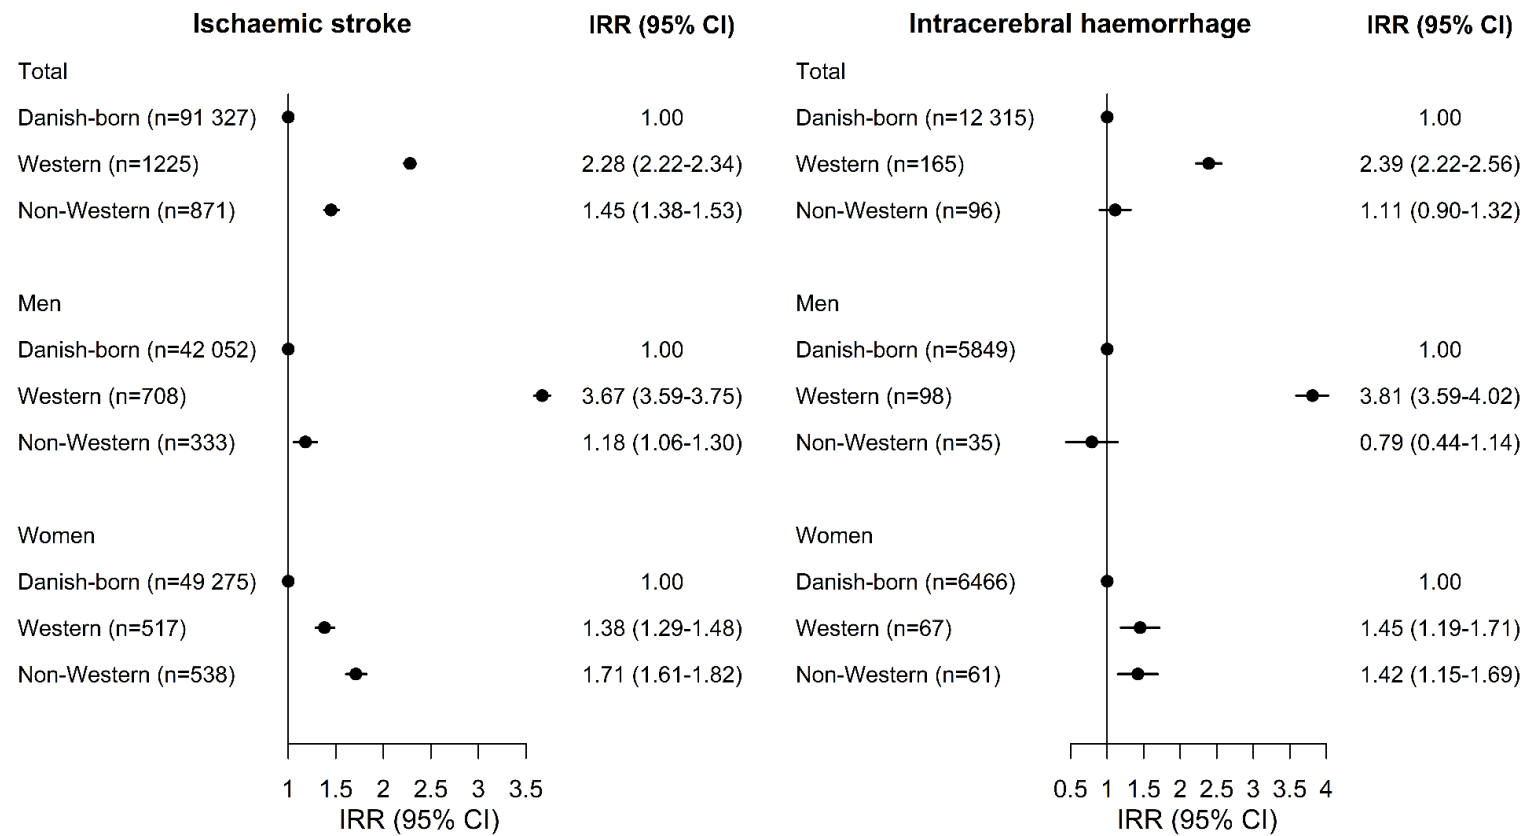

Figure S2. Incidence rate ratio (IRR) of ischaemic stroke and intracerebral haemorrhage by country classification.

Table S1. Data sources and description of variables.

| <b>Data Source</b>        | <b>Variables</b>                                                                                                                                                                                                          |
|---------------------------|---------------------------------------------------------------------------------------------------------------------------------------------------------------------------------------------------------------------------|
| Danish Stroke Registry    | Age, sex, marital status, smoking, Body Mass Index, stroke types (ischaemic stroke, intracerebral haemorrhage and unspecified stroke), transient ischaemic attack, stroke severity, thrombolysis and endovascular therapy |
| National Patient Registry | Acute myocardial infarction, hypertension, diabetes, atrial fibrillation and peripheral artery disease                                                                                                                    |
| Statistics Denmark        | Date of birth, income, education, employment status and date of immigration                                                                                                                                               |
| Cause of Death Register   | Date of death                                                                                                                                                                                                             |

Table S2. Age-standardised incidence rates of stroke, stroke types and transient ischaemic attack per 100 000 person years by ethnic group.

|                                   | Total   |                              | Men    |                              | Women  |                              |
|-----------------------------------|---------|------------------------------|--------|------------------------------|--------|------------------------------|
|                                   | n       | Incidence rates*<br>(95% CI) | n      | Incidence rates*<br>(95% CI) | n      | Incidence rates*<br>(95% CI) |
| <b>Stroke</b>                     |         |                              |        |                              |        |                              |
| Danish-born                       | 113 473 | 173 (172–174)                | 52 603 | 156 (155–157)                | 60 870 | 186 (185–188)                |
| Norwegian                         | 335     | 265 (236–296)                | 206    | 406 (352–467)                | 129    | 162 (134–194)                |
| Swedish                           | 289     | 302 (267–340)                | 180    | 524 (448–610)                | 109    | 170 (138–206)                |
| Polish                            | 186     | 572 (474–684)                | 108    | 1298 (1014–1636)             | 78     | 307 (226–408)                |
| German                            | 687     | 604 (552–659)                | 374    | 777 (682–881)                | 313    | 496 (438–560)                |
| Ex-Yugoslavian                    | 208     | 275 (234–321)                | 88     | 238 (187–299)                | 120    | 309 (246–382)                |
| Turkish                           | 338     | 185 (160–213)                | 149    | 154 (125–188)                | 189    | 214 (174–260)                |
| Iraqi                             | 165     | 253 (212–301)                | 54     | 156 (110–215)                | 111    | 368 (298–451)                |
| Iranian                           | 109     | 265 (215–323)                | 32     | 149 (97–219)                 | 77     | 449 (349–569)                |
| Pakistani                         | 224     | 367 (311–430)                | 75     | 226 (175–288)                | 149    | 538 (420–680)                |
| <b>Ischaemic stroke</b>           |         |                              |        |                              |        |                              |
| Danish-born                       | 91 327  | 139 (138–140)                | 42 052 | 125 (123–126)                | 49 275 | 151 (149–152)                |
| Norwegian                         | 278     | 220 (194–249)                | 172    | 340 (290–396)                | 106    | 132 (107–161)                |
| Swedish                           | 239     | 248 (217–283)                | 144    | 422 (354–499)                | 95     | 145 (116–178)                |
| Polish                            | 158     | 472 (384–574)                | 93     | 1075 (821–1383)              | 65     | 255 (181–350)                |
| German                            | 550     | 480 (434–529)                | 299    | 629 (544–724)                | 251    | 387 (336–443)                |
| Ex-Yugoslavian                    | 175     | 234 (196–278)                | 73     | 202 (155–260)                | 102    | 264 (205–334)                |
| Turkish                           | 281     | 160 (136–188)                | 122    | 132 (104–164)                | 159    | 187 (148–233)                |
| Iraqi                             | 132     | 211 (172–255)                | 42     | 128 (86–184)                 | 90     | 307 (242–384)                |
| Iranian                           | 95      | 228 (182–282)                | 28     | 129 (81–195)                 | 67     | 389 (296–501)                |
| Pakistani                         | 188     | 310 (258–370)                | 68     | 208 (158–268)                | 120    | 435 (325–571)                |
| <b>Intracerebral haemorrhage</b>  |         |                              |        |                              |        |                              |
| Danish-born                       | 12 315  | 19 (18–19)                   | 5849   | 17 (17–18)                   | 6466   | 20 (19–20)                   |
| Norwegian                         | 39      | 31 (22–43)                   | 24     | 47 (30–71)                   | 15     | 19 (10–32)                   |
| Swedish                           | 21      | 21 (13–32)                   | 15     | 40 (22–68)                   | 6      | 8 (3–17)                     |
| Polish                            | 20      | 82 (46–135)                  | 11     | 200 (95–370)                 | 9      | 35 (13–75)                   |
| German                            | 85      | 78 (60–100)                  | 48     | 94 (64–133)                  | 37     | 67 (45–96)                   |
| Ex-Yugoslavian                    | 15      | 19 (10–31)                   | 7      | 17 (7–35)                    | 8      | 21 (9–42)                    |
| Turkish                           | 31      | 14 (9–20)                    | 15     | 13 (7–23)                    | 16     | 13 (7–21)                    |
| Iraqi                             | 19      | 27 (15–43)                   | 6      | 17 (5–40)                    | 13     | 39 (19–69)                   |
| Iranian                           | 10      | 30 (14–55)                   | 3      | 18 (3–54)                    | 7      | 48 (19–100)                  |
| Pakistani                         | 21      | 39 (23–62)                   | 4      | 10 (3–26)                    | 17     | 76 (41–128)                  |
| <b>Transient ischaemic attack</b> |         |                              |        |                              |        |                              |

|                |        |             |      |               |      |              |
|----------------|--------|-------------|------|---------------|------|--------------|
| Danish-born    | 16 541 | 25 (25–26)  | 7654 | 23 (22–23)    | 8887 | 27 (27–28)   |
| Norwegian      | 40     | 34 (24–47)  | 28   | 57 (37–82)    | 12   | 18 (9–33)    |
| Swedish        | 47     | 44 (32–59)  | 28   | 76 (50–111)   | 19   | 26 (16–41)   |
| Polish         | 32     | 86 (53–133) | 22   | 216 (116–367) | 10   | 35 (14–71)   |
| German         | 88     | 76 (59–96)  | 46   | 95 (64–135)   | 42   | 66 (47–91)   |
| Ex-Yugoslavian | 26     | 35 (20–58)  | 14   | 39 (17–77)    | 12   | 29 (14–51)   |
| Turkish        | 53     | 30 (19–43)  | 16   | 21 (9–40)     | 37   | 38 (23–59)   |
| Iraqi          | 28     | 35 (22–52)  | 12   | 30 (13–59)    | 16   | 44 (24–75)   |
| Iranian        | 32     | 71 (47–102) | 11   | 40 (18–77)    | 21   | 122 (73–192) |
| Pakistani      | 35     | 50 (34–71)  | 10   | 30 (14–57)    | 25   | 70 (43–108)  |

CI indicates confidence interval. \*Standardised to 2004 Danish population age distribution. Stroke includes ischaemic stroke, intracerebral haemorrhage and unspecified stroke.

Table S3. Age-standardised incidence rates of stroke, stroke types and transient ischaemic attack per 100 000 person years by country classification.

|                                   | Total   |                              | Men    |                              | Women  |                              |
|-----------------------------------|---------|------------------------------|--------|------------------------------|--------|------------------------------|
|                                   | n       | Incidence rates*<br>(95% CI) | n      | Incidence rates*<br>(95% CI) | n      | Incidence rates*<br>(95% CI) |
| <b>Stroke</b>                     |         |                              |        |                              |        |                              |
| Danish-born                       | 113 473 | 173 (172–174)                | 52 603 | 156 (155–157)                | 60 870 | 186 (185–188)                |
| Western <sup>†</sup>              | 1497    | 390 (369–412)                | 868    | 560 (521–602)                | 629    | 258 (237–281)                |
| Non-Western <sup>‡</sup>          | 1044    | 237 (221–254)                | 398    | 171 (153–190)                | 646    | 305 (277–335)                |
| <b>Ischaemic stroke</b>           |         |                              |        |                              |        |                              |
| Danish-born                       | 91 327  | 139 (138–140)                | 42 052 | 125 (123–126)                | 49 275 | 151 (149–152)                |
| Western <sup>†</sup>              | 1225    | 317 (298–337)                | 708    | 457 (421–495)                | 517    | 208 (189–229)                |
| Non-Western <sup>‡</sup>          | 871     | 202 (187–219)                | 333    | 147 (130–165)                | 538    | 258 (232–286)                |
| <b>Intracerebral haemorrhage</b>  |         |                              |        |                              |        |                              |
| Danish-born                       | 12 315  | 19 (18–19)                   | 5849   | 17 (17–18)                   | 6466   | 20 (19–20)                   |
| Western <sup>†</sup>              | 165     | 45 (38–53)                   | 98     | 66 (53–81)                   | 67     | 29 (22–37)                   |
| Non-Western <sup>‡</sup>          | 96      | 21 (17–26)                   | 35     | 14 (9–19)                    | 61     | 28 (21–37)                   |
| <b>Transient ischaemic attack</b> |         |                              |        |                              |        |                              |
| Danish-born                       | 16 541  | 25 (25–26)                   | 7654   | 23 (22–23)                   | 8887   | 27 (27–28)                   |
| Western <sup>†</sup>              | 207     | 52 (45–61)                   | 124    | 76 (62–92)                   | 83     | 33 (26–42)                   |
| Non-Western <sup>‡</sup>          | 174     | 37 (30–44)                   | 63     | 26 (19–34)                   | 111    | 47 (37–58)                   |

CI indicates confidence interval. \*Standardised to 2004 Danish population age distribution. <sup>†</sup>Western includes Norwegian, Swedish, Polish and German. <sup>‡</sup>Non-Western includes Ex-Yugoslavian, Turkish, Iraqi, Iranian and Pakistani. Stroke includes ischaemic stroke, intracerebral haemorrhage and unspecified stroke.

Table S4. Association between duration of residence, age at immigration and all-cause 1-year mortality.

|                                             | Death | Unadjusted       | Model 1          | Model 2                 |
|---------------------------------------------|-------|------------------|------------------|-------------------------|
|                                             | n     | HR (95% CI)      | HR (95% CI)      | HR (95% CI)             |
| Danish-born (ref)                           | 2069  | 1.00             | 1.00             | 1.00                    |
| Duration of residence                       |       |                  |                  |                         |
| Immigrants* ( $\leq 15$ years of residence) | 54    | 0.69 (0.39–1.22) | 0.61 (0.34–1.09) | <b>0.36 (0.14–0.91)</b> |
| Immigrants* ( $> 15$ years of residence)    | 234   | 0.88 (0.70–1.12) | 0.89 (0.70–1.13) | 0.97 (0.73–1.29)        |
| Age at immigration                          |       |                  |                  |                         |
| 18–24 years                                 | 41    | 0.82 (0.46–1.45) | 0.61 (0.34–1.10) | 0.53 (0.25–1.09)        |
| 25–34 years                                 | 75    | 0.78 (0.52–1.18) | 0.80 (0.52–1.21) | 0.89 (0.53–1.50)        |
| 35–50 years                                 | 127   | 0.74 (0.53–1.04) | 0.75 (0.54–1.06) | 0.79 (0.50–1.23)        |
| $> 50$ years                                | 34    | 0.98 (0.53–1.81) | 0.99 (0.54–1.83) | 1.07 (0.52–2.22)        |

HR indicates hazard ratios and CI confidence interval. \*Immigrants include Norwegian, Swedish, Polish, German, Ex-Yugoslavian, Turkish, Iraqi, Iranian and Pakistani.

Model 1: Adjusted for age at stroke and sex.

Model 2: Model 1 adjusted for marital status, education, employment status and income.



Table S5. 3-year and 5-year hazard ratios for all-cause mortality by ethnic group.

|                                  | 3-year |                  |                  |                  | 5-year |                  |                  |                         |
|----------------------------------|--------|------------------|------------------|------------------|--------|------------------|------------------|-------------------------|
|                                  |        | Unadjusted       | Age adjusted     | Fully adjusted   |        | Unadjusted       | Age adjusted     | Fully adjusted          |
|                                  | n      | HR (95% CI)      | HR (95%)         | HR (95% CI)      | n      | HR (95% CI)      | HR (95% CI)      | HR (95% CI)             |
| <b>Ischaemic stroke</b>          |        |                  |                  |                  |        |                  |                  |                         |
| Men                              |        |                  |                  |                  |        |                  |                  |                         |
| Danish-born (ref)                | 9582   | 1.00             | 1.00             | 1.00             | 12 070 | 1.00             | 1.00             | 1.00                    |
| Western*                         | 156    | 0.97 (0.83–1.14) | 0.97 (0.83–1.13) | 0.90 (0.72–1.13) | 205    | 1.02 (0.89–1.17) | 1.01 (0.88–1.16) | 0.96 (0.78–1.16)        |
| Non-Western†                     | 36     | 1.19 (0.86–1.65) | 1.46 (1.05–2.02) | 1.05 (0.67–1.67) | 42     | 1.12 (0.83–1.52) | 1.39 (1.03–1.89) | 0.95 (0.62–1.46)        |
| Women                            |        |                  |                  |                  |        |                  |                  |                         |
| Danish-born (ref)                | 10 495 | 1.00             | 1.00             | 1.00             | 13 631 | 1.00             | 1.00             | 1.00                    |
| Western*                         | 99     | 0.97 (0.79–1.18) | 1.03 (0.84–1.25) | 0.89 (0.63–1.27) | 135    | 1.05 (0.88–1.24) | 1.11 (0.94–1.31) | 0.93 (0.67–1.30)        |
| Non-Western†                     | 53     | 0.82 (0.62–1.07) | 0.91 (0.69–1.20) | 0.88 (0.59–1.31) | 72     | 0.83 (0.66–1.05) | 0.93 (0.74–1.18) | 0.74 (0.51–1.06)        |
| <b>Intracerebral haemorrhage</b> |        |                  |                  |                  |        |                  |                  |                         |
| Men                              |        |                  |                  |                  |        |                  |                  |                         |
| Danish-born (ref)                | 2479   | 1.00             | 1.00             | 1.00             | 2815   | 1.00             | 1.00             | 1.00                    |
| Western*                         | 33     | 1.30 (0.92–1.84) | 1.32 (0.93–1.85) | 1.51 (0.94–2.43) | 37     | 1.28 (0.92–1.77) | 1.29 (0.93–1.78) | <b>1.58 (1.01–2.48)</b> |
| Non-Western†                     | 10     | 0.84 (0.45–1.57) | 0.97 (0.52–1.83) | 1.17 (0.43–3.23) | 10     | 0.66 (0.35–1.23) | 0.78 (0.41–1.46) | 1.19 (0.44–3.26)        |
| Women                            |        |                  |                  |                  |        |                  |                  |                         |
| Danish-born (ref)                | 2737   | 1.00             | 1.00             | 1.00             | 3103   | 1.00             | 1.00             | 1.00                    |
| Western*                         | 21     | 0.74 (0.48–1.14) | 0.75 (0.48–1.13) | 1.12 (0.65–1.93) | 26     | 0.80 (0.55–1.18) | 0.81 (0.55–1.19) | 1.24 (0.74–2.08)        |
| Non-Western†                     | 22     | 0.83 (0.55–1.27) | 0.89 (0.58–1.35) | 0.75 (0.41–1.40) | 26     | 0.91 (0.62–1.34) | 0.98 (0.67–1.45) | 0.79 (0.45–1.39)        |

HR indicates hazard ratios and CI confidence interval. \*Western includes Norwegian, Swedish, Polish and German. †Non-Western includes Ex-Yugoslavian, Turkish, Iraqi, Iranian and Pakistani. The fully adjusted model included age at stroke, smoking, acute myocardial infarction, diabetes, hypertension, atrial fibrillation, peripheral artery disease, marital status, education, employment status, income, stroke severity and thrombolytic or endovascular therapy (only for ischaemic stroke).

Table S6. Sensitivity analysis showing all-cause 1-year mortality hazard ratios by ethnic group.

|                                  | <b>Unadjusted</b>       | <b>Model 1</b>          | <b>Model 2</b>          | <b>Model 3</b>   | <b>Model 4</b>          |
|----------------------------------|-------------------------|-------------------------|-------------------------|------------------|-------------------------|
|                                  | HR (95% CI)             | HR (95% CI)             | HR (95% CI)             | HR (95% CI)      | HR (95% CI)             |
| <b>Ischaemic stroke</b>          |                         |                         |                         |                  |                         |
| Men                              |                         |                         |                         |                  |                         |
| Danish-born (ref)                | 1.00                    | 1.00                    | 1.00                    | 1.00             | 1.00                    |
| Western*                         | 1.08 (0.87–1.33)        | 1.09 (0.88–1.34)        | 1.01 (0.81–1.26)        | 0.94 (0.75–1.19) | 0.94 (0.73–1.22)        |
| Non-Western†                     | 0.88 (0.55–1.43)        | 1.03 (0.64–1.65)        | 0.85 (0.51–1.39)        | 0.73 (0.44–1.23) | 0.62 (0.33–1.17)        |
| Women                            |                         |                         |                         |                  |                         |
| Danish-born (ref)                | 1.00                    | 1.00                    | 1.00                    | 1.00             | 1.00                    |
| Western*                         | 0.91 (0.66–1.25)        | 0.97 (0.71–1.33)        | 0.89 (0.62–1.27)        | 0.79 (0.53–1.12) | 0.64 (0.40–1.02)        |
| Non-Western†                     | 0.89 (0.58–1.37)        | 0.94 (0.61–1.44)        | 0.78 (0.49–1.26)        | 0.78 (0.48–1.29) | 0.86 (0.51–1.45)        |
| <b>Intracerebral haemorrhage</b> |                         |                         |                         |                  |                         |
| Men                              |                         |                         |                         |                  |                         |
| Danish-born (ref)                | 1.00                    | 1.00                    | 1.00                    | 1.00             | 1.00                    |
| Western*                         | <b>1.64 (1.05–2.59)</b> | <b>1.69 (1.07–2.66)</b> | <b>1.76 (1.08–2.85)</b> | 1.60 (0.99–2.60) | <b>1.63 (1.00–2.65)</b> |
| Non-Western†                     | 1.52 (0.73–3.21)        | 1.00 (0.44–2.31)        | 1.27 (0.57–2.85)        | 1.14 (0.50–2.56) | 1.19 (0.43–3.29)        |
| Women                            |                         |                         |                         |                  |                         |
| Danish-born (ref)                | 1.00                    | 1.00                    | 1.00                    | 1.00             | 1.00                    |
| Western*                         | 0.81 (0.46–1.43)        | 0.81 (0.45–1.43)        | 0.80 (0.45–1.42)        | 0.99 (0.56–1.77) | 0.78 (0.39–1.54)        |
| Non-Western†                     | <b>0.49 (0.25–0.94)</b> | <b>0.50 (0.25–0.96)</b> | <b>0.45 (0.20–1.02)</b> | 0.53 (0.24–1.20) | 0.49 (0.19–1.21)        |

HR indicates hazard ratios and CI confidence interval. \*Western includes Norwegian, Swedish, Polish and German. †Non-Western includes Ex-Yugoslavian, Turkish, Iraqi, Iranian and Pakistani.

Model 1: Adjusted for age at stroke.

Model 2: Additionally adjusted for smoking, acute myocardial infarction, diabetes, hypertension, atrial fibrillation and peripheral artery disease.

Model 3: Further adjusted for stroke severity and thrombolytic or endovascular therapy (only for ischaemic stroke).

Model 4 (Fully adjusted): Model 3 additionally adjusted for marital status, education, employment status and income.

Table S7. Sensitivity analysis showing association between duration of residence, age at immigration and all-cause 1-year mortality.

|                                             | <b>Unadjusted</b>       | <b>Model 1</b>          | <b>Model 2</b>          |
|---------------------------------------------|-------------------------|-------------------------|-------------------------|
|                                             | HR (95% CI)             | HR (95% CI)             | HR (95% CI)             |
| Danish-born (ref)                           | 1.00                    | 1.00                    | 1.00                    |
| Duration of residence                       |                         |                         |                         |
| Immigrants* ( $\leq 15$ years of residence) | 0.60 (0.28–1.30)        | 0.53 (0.24–1.19)        | <b>0.27 (0.09–0.79)</b> |
| Immigrants* ( $> 15$ years of residence)    | 0.82 (0.63–1.06)        | 0.84 (0.64–1.09)        | 0.90 (0.66–1.23)        |
| Age at immigration                          |                         |                         |                         |
| 18–24 years                                 | <b>0.50 (0.26–0.95)</b> | <b>0.42 (0.22–0.81)</b> | <b>0.35 (0.15–0.77)</b> |
| 25–34 years                                 | 0.84 (0.51–1.38)        | 0.92 (0.55–1.53)        | 0.98 (0.54–1.81)        |
| 35–50 years                                 | 0.74 (0.50–1.08)        | 0.72 (0.48–1.07)        | 0.83 (0.52–1.34)        |
| $> 50$ years                                | 1.16 (0.57–2.36)        | 1.07 (0.53–2.22)        | 1.05 (0.47–2.33)        |

HR indicates hazard ratios and CI confidence interval. \*Immigrants include Norwegian, Swedish, Polish, German, Ex-Yugoslavian, Turkish, Iraqi, Iranian and Pakistani.

Model 1: Adjusted for age at stroke and sex.

Model 2: Model 1 adjusted for marital status, education, employment status and income.

Table S8. Impact of comorbidities on all-cause 1-year mortality by ethnic group.

|                                  | Model 1          | Model 2          | Model 3          | Model 4          | Model 5          | Model 6          |
|----------------------------------|------------------|------------------|------------------|------------------|------------------|------------------|
|                                  | HR (95% CI)      |
| <b>Ischaemic stroke</b>          |                  |                  |                  |                  |                  |                  |
| Men                              |                  |                  |                  |                  |                  |                  |
| Danish-born (ref)                | 1.00             | 1.00             | 1.00             | 1.00             | 1.00             | 1.00             |
| Western*                         | 1.08 (0.89–1.29) | 1.10 (0.92–1.33) | 1.11 (0.92–1.33) | 1.10 (0.92–1.32) | 1.10 (0.91–1.32) | 1.04 (0.84–1.30) |
| Non-Western†                     | 1.26 (0.84–1.91) | 1.35 (0.89–2.04) | 1.29 (0.86–1.96) | 1.27 (0.84–1.92) | 1.39 (0.92–2.09) | 0.90 (0.55–1.48) |
| Women                            |                  |                  |                  |                  |                  |                  |
| Danish-born (ref)                | 1.00             | 1.00             | 1.00             | 1.00             | 1.00             | 1.00             |
| Western*                         | 0.91 (0.69–1.19) | 0.92 (0.70–1.21) | 0.91 (0.69–1.19) | 0.92 (0.69–1.21) | 0.93 (0.71–1.23) | 0.85 (0.59–1.21) |
| Non-Western†                     | 0.98 (0.69–1.38) | 1.00 (0.71–1.42) | 1.02 (0.72–1.45) | 0.96 (0.68–1.36) | 1.02 (0.72–1.44) | 0.87 (0.55–1.38) |
| <b>Intracerebral haemorrhage</b> |                  |                  |                  |                  |                  |                  |
| Men                              |                  |                  |                  |                  |                  |                  |
| Danish-born (ref)                | 1.00             | 1.00             | 1.00             | 1.00             | 1.00             | 1.00             |
| Western*                         | 1.46 (1.02–2.09) | 1.48 (1.03–2.12) | 1.54 (1.08–2.22) | 1.48 (1.03–2.12) | 1.48 (1.03–2.13) | 1.66 (1.03–2.68) |
| Non-Western†                     | 1.03 (0.53–2.00) | 1.06 (0.54–2.05) | 1.01 (0.52–1.97) | 1.10 (0.53–2.01) | 1.12 (0.58–2.19) | 0.99 (0.43–2.29) |
| Women                            |                  |                  |                  |                  |                  |                  |
| Danish-born (ref)                | 1.00             | 1.00             | 1.00             | 1.00             | 1.00             | 1.00             |
| Western*                         | 0.70 (0.43–1.15) | 0.74 (0.45–1.21) | 0.78 (0.48–1.28) | 0.73 (0.45–1.20) | 0.74 (0.45–1.21) | 0.84 (0.47–1.48) |
| Non-Western†                     | 0.53 (0.29–0.99) | 0.53 (0.28–0.99) | 0.54 (0.29–1.00) | 0.52 (0.28–0.97) | 0.53 (0.28–0.99) | 0.42 (0.18–0.94) |

HR indicates hazard ratios and CI confidence interval. \*Western includes Norwegian, Swedish, Polish and German. †Non-Western includes Ex-Yugoslavian, Turkish, Iraqi, Iranian and Pakistani.

Model 1: Adjusted for age at stroke and smoking.

Model 2: Adjusted for age at stroke and acute myocardial infarction.

Model 3: Adjusted for age at stroke and atrial fibrillation.

Model 4: Adjusted for age at stroke and diabetes.

Model 5: Adjusted for age at stroke and hypertension.

Model 6: Adjusted for age at stroke and peripheral artery disease.
